# Supplementary material
Source: PubMed Central journal article supplement (PMC6697211)
Supplement: NIHMS1018982-supplement-2.pdf [file NIHMS1018982-supplement-2.pdf]

**Supplemental Table 1.** Partial correlations between pentosidine and cortical bone measures while controlling for race, sex, maturation, height, MCSA, and QUICKI

|           | r             | P            |
|-----------|---------------|--------------|
| Tibia     |               |              |
| Ct.vBMD   | -0.032        | 0.698        |
| Ct.BMC    | -0.153        | 0.066        |
| Tt.Ar     | 0.045         | 0.589        |
| Ct.Ar     | -0.156        | 0.060        |
| Ct.Th     | <b>-0.202</b> | <b>0.015</b> |
| Peri.Circ | 0.066         | 0.432        |
| Endo.Circ | 0.143         | 0.086        |
| pSSI      | -0.062        | 0.460        |
| Radius    |               |              |
| Ct.vBMD   | -0.081        | 0.330        |
| Ct.BMC    | -0.056        | 0.504        |
| Tt.Ar     | 0.027         | 0.743        |
| Ct.Ar     | -0.051        | 0.536        |
| Ct.Th     | -0.096        | 0.246        |
| Peri.Circ | 0.040         | 0.627        |
| Endo.Circ | 0.083         | 0.319        |
| pSSI      | -0.023        | 0.786        |

MCSA, muscle cross-sectional area; QUICKI, Quantitative Insulin Sensitivity Check Index; Ct.vBMD, cortical volumetric bone mineral density; Ct.BMC, cortical bone mineral content; Tt.Ar, total bone area; Ct.Ar, cortical bone area; Ct.Th, cortical thickness; Peri.Circ, periosteal circumference; Endo.Circ, endosteal circumference; pSSI, polar strength

---

strain index

1
