# Supplementary material
Source: PubMed Central journal article supplement (PMC6697211)

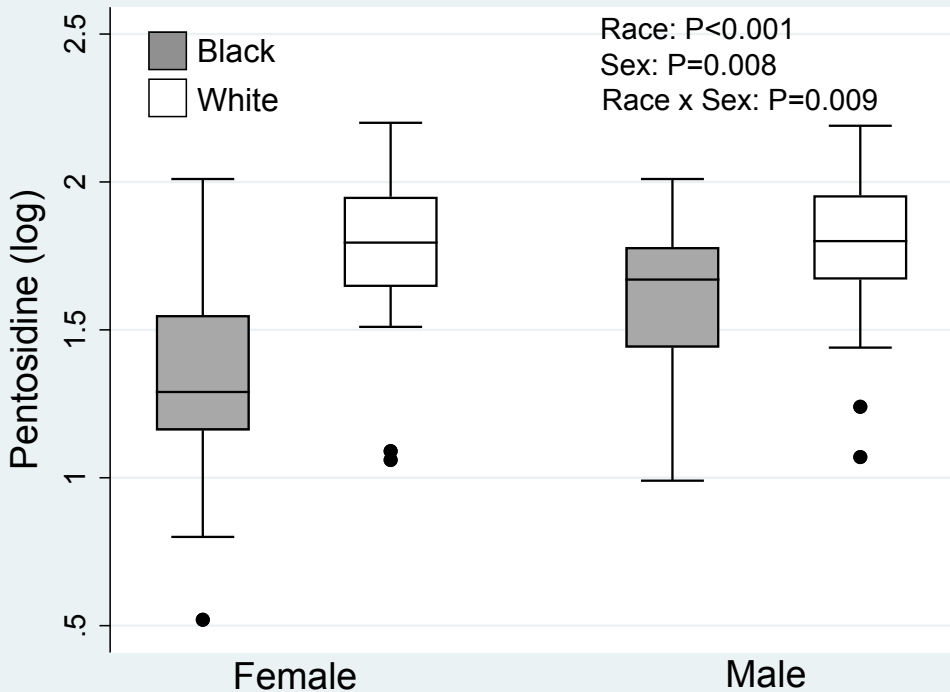

Supplement: NIHMS1018982-supplement-Supp_info.pdf [file NIHMS1018982-supplement-Supp_info.pdf]
